# Supplementary material for: The Relationship between the Oral Microbiota and Metabolic Syndrome
Source: MDPI journal article supplement (doi:10.3390/biomedicines11010003), 2022-12-20
Supplement: s1 [file s1]

*Supplementary Materials*

# **The Relationship between the Oral Microbiota and Metabolic Syndrome**

**Yvonne Prince, Glenda M. Davison, Saarah F. G. Davids, Rajiv T. Erasmus, Andre P. Kengne, Lisa M. Graham, Shanel Raghubeer and Tandi E. Matsha**

**Table S1.** Correlation table indicating genus and species and impact of metabolic parameters.

|                                    | Age    |         | BMI    |         | Waist  |         | SBP    |         | DBP    |         | FBG    |         | HBA1c  |         | Insulin fasting |         | Trigs  |         | LDL    |         | HDL    |         | CRP    |         |
|------------------------------------|--------|---------|--------|---------|--------|---------|--------|---------|--------|---------|--------|---------|--------|---------|-----------------|---------|--------|---------|--------|---------|--------|---------|--------|---------|
|                                    | r      | P-value | r               | P-value | r      | P-value | r      | P-value | r      | P-value | r      | P-value |
| <i>Actinomyces dentalis</i>        | 0.218  | 0.014   | 0.305  | 0.001   | 0.448  | <0.001  | 0.093  | 0.298   | 0.064  | 0.479   | 0.293  | 0.001   | 0.316  | <0.001  | 0.264           | 0.003   | 0.096  | 0.284   | 0.264  | 0.003   | -0.144 | 0.112   | 0.080  | 0.372   |
| <i>Actinomyces naeslundii</i>      | 0.200  | 0.024   | 0.445  | <0.001  | 0.456  | <0.001  | -0.042 | 0.639   | -0.104 | 0.246   | 0.300  | 0.001   | 0.261  | 0.003   | 0.410           | <0.001  | 0.245  | 0.006   | 0.217  | 0.015   | -0.234 | 0.009   | 0.131  | 0.143   |
| <i>Actinomyces odontolyticus</i>   | -0.023 | 0.803   | -0.244 | 0.008   | -0.291 | 0.001   | -0.021 | 0.817   | -0.073 | 0.431   | -0.240 | 0.008   | -0.292 | 0.001   | -0.331          | <0.001  | -0.190 | 0.038   | -0.310 | 0.001   | 0.250  | 0.006   | -0.187 | 0.041   |
| <i>Actinomyces viscosus</i>        | -0.049 | 0.618   | 0.301  | 0.002   | 0.284  | 0.003   | -0.131 | 0.179   | -0.026 | 0.789   | 0.113  | 0.248   | 0.127  | 0.191   | 0.306           | 0.001   | 0.089  | 0.360   | 0.184  | 0.059   | -0.169 | 0.086   | 0.077  | 0.428   |
| <i>Aggregatibacter segnis</i>      | -0.095 | 0.313   | -0.118 | 0.213   | -0.169 | 0.073   | 0.128  | 0.172   | 0.075  | 0.423   | -0.096 | 0.307   | -0.165 | 0.078   | -0.246          | 0.008   | -0.205 | 0.029   | -0.163 | 0.084   | 0.215  | 0.022   | -0.059 | 0.534   |
| <i>Campylobacter gracilis</i>      | -0.143 | 0.109   | -0.072 | 0.424   | -0.243 | 0.006   | -0.161 | 0.071   | -0.164 | 0.065   | -0.328 | <0.001  | -0.194 | 0.029   | -0.123          | 0.170   | -0.172 | 0.055   | -0.162 | 0.070   | 0.018  | 0.841   | 0.128  | 0.151   |
| <i>Capnocytophaga leadbetteri</i>  | 0.013  | 0.886   | -0.091 | 0.323   | -0.079 | 0.389   | 0.141  | 0.123   | 0.146  | 0.111   | -0.005 | 0.960   | -0.015 | 0.867   | -0.190          | 0.037   | -0.079 | 0.389   | 0.028  | 0.760   | 0.122  | 0.185   | -0.052 | 0.573   |
| <i>Corynebacterium matruchotii</i> | 0.339  | <0.001  | 0.372  | <0.001  | 0.495  | <0.001  | 0.144  | 0.120   | 0.117  | 0.206   | 0.390  | <0.001  | 0.394  | <0.001  | 0.420           | <0.001  | 0.236  | 0.010   | 0.341  | <0.001  | -0.192 | 0.038   | 0.116  | 0.210   |
| <i>Fusobacterium canifelinum</i>   | -0.234 | 0.009   | -0.226 | 0.012   | -0.305 | 0.001   | -0.056 | 0.536   | 0.046  | 0.609   | -0.300 | 0.001   | -0.289 | 0.001   | -0.243          | 0.007   | -0.219 | 0.014   | -0.062 | 0.497   | 0.104  | 0.253   | -0.091 | 0.310   |
| <i>Fusobacterium nucleatum</i>     | -0.336 | <0.001  | -0.410 | <0.001  | -0.476 | <0.001  | -0.061 | 0.491   | 0.036  | 0.685   | -0.299 | 0.001   | -0.350 | <0.001  | -0.319          | <0.001  | -0.297 | 0.001   | -0.143 | 0.109   | 0.116  | 0.196   | -0.171 | 0.054   |
| <i>Fusobacterium periodonticum</i> | -0.067 | 0.500   | -0.290 | 0.003   | -0.279 | 0.005   | 0.078  | 0.435   | 0.046  | 0.644   | -0.080 | 0.423   | -0.186 | 0.060   | -0.395          | <0.001  | -0.239 | 0.015   | -0.214 | 0.031   | 0.286  | 0.004   | -0.196 | 0.047   |
| <i>Granulicatella adiacens</i>     | -0.107 | 0.242   | -0.031 | 0.736   | -0.118 | 0.199   | 0.031  | 0.738   | -0.026 | 0.776   | -0.212 | 0.019   | -0.212 | 0.019   | -0.022          | 0.814   | -0.006 | 0.945   | -0.053 | 0.564   | -0.009 | 0.920   | -0.076 | 0.408   |
| <i>Haemophilus parainfluenzae</i>  | -0.132 | 0.161   | -0.192 | 0.043   | -0.301 | 0.001   | 0.009  | 0.924   | 0.039  | 0.684   | -0.336 | <0.001  | -0.393 | <0.001  | -0.224          | 0.017   | -0.128 | 0.178   | -0.134 | 0.157   | 0.250  | 0.008   | -0.227 | 0.015   |
| <i>Leptotrichia buccalis</i>       | 0.086  | 0.363   | 0.212  | 0.025   | 0.323  | <0.001  | 0.134  | 0.155   | 0.146  | 0.120   | 0.348  | <0.001  | 0.290  | 0.002   | 0.215           | 0.022   | 0.156  | 0.099   | 0.176  | 0.063   | -0.010 | 0.915   | 0.079  | 0.402   |
| <i>Leptotrichia genomosp.</i>      | 0.196  | 0.045   | 0.120  | 0.227   | 0.175  | 0.075   | 0.065  | 0.512   | 0.062  | 0.532   | 0.200  | 0.041   | 0.275  | 0.004   | 0.095           | 0.337   | 0.069  | 0.482   | 0.158  | 0.110   | -0.020 | 0.845   | 0.008  | 0.938   |
| <i>Leptotrichia hofstadii</i>      | 0.035  | 0.724   | 0.121  | 0.224   | 0.154  | 0.120   | 0.036  | 0.716   | 0.037  | 0.710   | 0.109  | 0.269   | 0.119  | 0.228   | 0.248           | 0.012   | 0.060  | 0.546   | 0.150  | 0.130   | -0.127 | 0.203   | 0.102  | 0.303   |
| <i>Leptotrichia hongkongensis</i>  | 0.046  | 0.654   | 0.166  | 0.104   | 0.133  | 0.193   | -0.084 | 0.411   | -0.102 | 0.317   | -0.148 | 0.145   | -0.037 | 0.715   | 0.135           | 0.187   | 0.182  | 0.073   | 0.119  | 0.241   | -0.079 | 0.441   | -0.046 | 0.652   |
| <i>Leptotrichia wadei</i>          | 0.221  | 0.017   | 0.153  | 0.106   | 0.181  | 0.055   | 0.078  | 0.408   | -0.011 | 0.906   | 0.032  | 0.732   | 0.210  | 0.024   | 0.155           | 0.099   | 0.065  | 0.489   | 0.359  | <0.001  | -0.055 | 0.564   | 0.049  | 0.604   |
| <i>Mannheimia varigena</i>         | -0.088 | 0.340   | -0.025 | 0.789   | -0.112 | 0.223   | 0.048  | 0.602   | 0.068  | 0.459   | -0.187 | 0.040   | -0.255 | 0.005   | -0.084          | 0.359   | -0.055 | 0.551   | -0.053 | 0.568   | 0.029  | 0.751   | -0.226 | 0.013   |
| <i>Neisseria flavescens</i>        | 0.075  | 0.459   | -0.043 | 0.672   | -0.001 | 0.995   | 0.016  | 0.873   | -0.044 | 0.661   | 0.006  | 0.951   | -0.103 | 0.309   | -0.025          | 0.805   | -0.071 | 0.485   | 0.021  | 0.839   | 0.029  | 0.775   | -0.120 | 0.234   |

|                                  |        |       |        |        |        |        |        |       |        |       |        |       |        |       |        |        |        |       |        |       |        |       |        |       |
|----------------------------------|--------|-------|--------|--------|--------|--------|--------|-------|--------|-------|--------|-------|--------|-------|--------|--------|--------|-------|--------|-------|--------|-------|--------|-------|
| <i>Prevotella histicola</i>      | -0.047 | 0.650 | 0.198  | 0.055  | 0.173  | 0.094  | -0.079 | 0.448 | 0.075  | 0.473 | 0.058  | 0.575 | 0.212  | 0.040 | 0.183  | 0.078  | -0.059 | 0.572 | 0.074  | 0.479 | -0.071 | 0.502 | 0.212  | 0.039 |
| <i>Prevotella maculosa</i>       | 0.002  | 0.982 | 0.108  | 0.236  | 0.054  | 0.552  | -0.137 | 0.129 | -0.120 | 0.183 | -0.057 | 0.526 | 0.049  | 0.589 | 0.133  | 0.144  | 0.062  | 0.498 | -0.034 | 0.705 | -0.115 | 0.208 | 0.048  | 0.595 |
| <i>Prevotella melaninogenica</i> | 0.030  | 0.747 | -0.135 | 0.141  | -0.101 | 0.270  | -0.049 | 0.594 | -0.003 | 0.972 | 0.031  | 0.736 | -0.120 | 0.187 | -0.134 | 0.143  | 0.047  | 0.610 | -0.073 | 0.424 | 0.067  | 0.467 | 0.005  | 0.952 |
| <i>Prevotella oris</i>           | 0.234  | 0.012 | 0.161  | 0.090  | 0.170  | 0.072  | 0.062  | 0.515 | 0.000  | 0.996 | 0.042  | 0.655 | 0.059  | 0.530 | 0.208  | 0.027  | 0.116  | 0.219 | 0.093  | 0.327 | -0.154 | 0.105 | 0.036  | 0.705 |
| <i>Prevotella oulorum</i>        | -0.058 | 0.539 | 0.058  | 0.538  | -0.029 | 0.759  | -0.181 | 0.052 | -0.240 | 0.009 | -0.108 | 0.248 | 0.012  | 0.902 | -0.024 | 0.803  | -0.143 | 0.127 | -0.009 | 0.925 | -0.011 | 0.905 | 0.191  | 0.040 |
| <i>Prevotella pallens</i>        | 0.030  | 0.777 | -0.178 | 0.099  | -0.217 | 0.042  | 0.056  | 0.605 | 0.014  | 0.897 | -0.145 | 0.175 | -0.173 | 0.105 | -0.249 | 0.019  | -0.042 | 0.694 | -0.002 | 0.985 | 0.177  | 0.098 | 0.012  | 0.908 |
| <i>Prevotella veroralis</i>      | -0.036 | 0.702 | 0.081  | 0.396  | 0.036  | 0.706  | -0.113 | 0.228 | -0.162 | 0.083 | 0.053  | 0.576 | 0.088  | 0.352 | 0.120  | 0.202  | 0.094  | 0.316 | -0.016 | 0.865 | -0.150 | 0.112 | -0.029 | 0.757 |
| <i>Selenomonas noxia</i>         | 0.173  | 0.056 | 0.187  | 0.040  | 0.147  | 0.108  | -0.015 | 0.873 | -0.056 | 0.539 | -0.043 | 0.635 | 0.051  | 0.578 | 0.164  | 0.072  | -0.006 | 0.950 | 0.029  | 0.749 | 0.040  | 0.661 | 0.080  | 0.381 |
| <i>Streptococcus gordonii</i>    | -0.230 | 0.010 | 0.022  | 0.809  | -0.083 | 0.366  | -0.029 | 0.746 | -0.017 | 0.849 | -0.218 | 0.016 | -0.155 | 0.087 | -0.099 | 0.280  | -0.099 | 0.276 | 0.029  | 0.749 | 0.140  | 0.127 | -0.054 | 0.553 |
| <i>Streptococcus mutans</i>      | -0.126 | 0.345 | -0.109 | 0.416  | -0.149 | 0.263  | 0.001  | 0.994 | 0.104  | 0.439 | -0.154 | 0.250 | -0.144 | 0.282 | -0.255 | 0.055  | -0.029 | 0.827 | 0.284  | 0.032 | 0.084  | 0.533 | -0.006 | 0.967 |
| <i>Streptococcus sanguinis</i>   | 0.252  | 0.007 | 0.436  | <0.001 | 0.376  | <0.001 | 0.112  | 0.238 | 0.093  | 0.327 | 0.189  | 0.045 | 0.109  | 0.250 | 0.409  | <0.001 | 0.269  | 0.004 | 0.213  | 0.024 | -0.123 | 0.198 | 0.094  | 0.321 |
| <i>Veillonella alcalescens</i>   | -0.057 | 0.522 | 0.118  | 0.191  | -0.017 | 0.853  | -0.072 | 0.418 | -0.071 | 0.425 | -0.164 | 0.065 | -0.129 | 0.148 | 0.004  | 0.964  | -0.051 | 0.567 | -0.051 | 0.570 | 0.025  | 0.783 | 0.001  | 0.993 |
| <i>Veillonella parvula</i>       | -0.201 | 0.025 | -0.093 | 0.307  | -0.148 | 0.101  | -0.279 | 0.002 | -0.224 | 0.012 | -0.249 | 0.005 | -0.222 | 0.013 | -0.171 | 0.058  | -0.080 | 0.380 | -0.171 | 0.057 | 0.044  | 0.632 | -0.033 | 0.715 |
| <i>Veillonella rogosae</i>       | -0.147 | 0.099 | -0.100 | 0.266  | -0.212 | 0.017  | -0.100 | 0.263 | -0.101 | 0.260 | -0.244 | 0.006 | -0.150 | 0.093 | -0.192 | 0.031  | -0.162 | 0.070 | -0.013 | 0.886 | 0.087  | 0.337 | -0.041 | 0.644 |
| <i>Mets Other</i>                | 0.144  | 0.105 | 0.176  | 0.049  | 0.172  | 0.054  | 0.105  | 0.238 | 0.151  | 0.090 | 0.000  | 0.999 | 0.086  | 0.337 | 0.166  | 0.062  | 0.035  | 0.695 | 0.118  | 0.186 | -0.026 | 0.772 | 0.158  | 0.075 |
| <i>Perid_Other</i>               | 0.011  | 0.904 | 0.145  | 0.105  | 0.094  | 0.293  | 0.005  | 0.956 | 0.117  | 0.189 | 0.000  | 0.996 | 0.012  | 0.897 | 0.139  | 0.118  | -0.005 | 0.954 | 0.092  | 0.305 | 0.006  | 0.950 | 0.173  | 0.051 |
| <i>Bleeding Other</i>            | 0.013  | 0.888 | 0.131  | 0.142  | 0.082  | 0.357  | 0.018  | 0.842 | 0.129  | 0.147 | 0.017  | 0.850 | 0.032  | 0.719 | 0.137  | 0.125  | 0.010  | 0.910 | 0.100  | 0.263 | 0.001  | 0.994 | 0.156  | 0.079 |

**Table S2.** Odds ratio indicating genus and species vs MetS.

|                                        | Model 1               |         | Model 2              |         | Model 3              |         | Model 4              |         | Model 5               |         | Model 6              |         |
|----------------------------------------|-----------------------|---------|----------------------|---------|----------------------|---------|----------------------|---------|-----------------------|---------|----------------------|---------|
|                                        | OR (95% CI)           | P-value | OR (95% CI)          | P-value | OR (95% CI)          | P-value | OR (95% CI)          | P-value | OR (95% CI)           | P-value | OR (95% CI)          | P-value |
| <i>Actinomyces dentalis</i>            | 3.33 (1.58;<br>7.03)  | 0.002   | 2.14 (0.88;<br>5.22) | 0.094   | 2.07 (0.85;<br>5.04) | 0.112   | 2.07 (0.83;<br>5.13) | 0.117   | 2.02 (0.76;<br>5.34)  | 0.156   | 2.00 (0.74;<br>5.45) | 0.174   |
| <i>Actinomyces naeslundii</i>          | 2.21 (1.24;<br>3.95)  | 0.007   | 1.10 (0.78;<br>1.55) | 0.584   | 0.96 (0.46;<br>1.99) | 0.906   | 0.89 (0.45;<br>1.77) | 0.744   | 0.72 (0.35;<br>1.45)  | 0.356   | 0.72 (0.34;<br>1.51) | 0.382   |
| <i>Actinomyces<br/>odontolyticus</i>   | 0.17 (0.03;<br>0.82)  | 0.027   | 0.31 (0.04;<br>2.31) | 0.252   | 0.28 (0.04;<br>2.17) | 0.224   | 0.40 (0.05;<br>3.23) | 0.392   | 0.89 (0.08;<br>10.08) | 0.927   | 1.29 (0.1;<br>16.28) | 0.843   |
| <i>Actinomyces viscosus</i>            | 5.10 (0.54;<br>48.32) | 0.155   | 1.18 (0.64;<br>2.17) | 0.594   | 0.98 (0.28;<br>3.46) | 0.979   | 0.92 (0.26;<br>3.29) | 0.897   | 1.04 (0.31;<br>3.51)  | 0.944   | 1.11 (0.31;<br>4.00) | 0.876   |
| <i>Aggregatibacter segnis</i>          | 0.82 (0.53;<br>1.25)  | 0.354   | 0.93 (0.49;<br>1.77) | 0.820   | 0.85 (0.44;<br>1.66) | 0.639   | 0.92 (0.49;<br>1.75) | 0.808   | 1.20 (0.50;<br>2.87)  | 0.679   | 1.22 (0.53;<br>2.81) | 0.638   |
| <i>Campylobacter gracilis</i>          | 0.52 (0.32;<br>0.85)  | 0.008   | 0.30 (0.15;<br>0.60) | 0.001   | 0.30 (0.14;<br>0.62) | 0.001   | 0.29 (0.14;<br>0.60) | 0.001   | 0.29 (0.12;<br>0.70)  | 0.006   | 0.29 (0.12;<br>0.68) | 0.005   |
| <i>Capnocytophaga<br/>leadbetteri</i>  | 0.58 (0.22;<br>1.53)  | 0.270   | 0.64 (0.15;<br>2.66) | 0.540   | 0.72 (0.17;<br>3.03) | 0.654   | 0.65 (0.15;<br>2.79) | 0.562   | 0.76 (0.17;<br>3.44)  | 0.721   | 0.66 (0.14;<br>3.07) | 0.594   |
| <i>Corynebacterium<br/>matruchotii</i> | 1.46 (1.18;<br>1.80)  | 0.001   | 1.30 (1.01;<br>1.67) | 0.042   | 1.29 (1.00;<br>1.66) | 0.053   | 1.31 (1.01;<br>1.69) | 0.039   | 1.24 (0.95;<br>1.63)  | 0.120   | 1.24 (0.94;<br>1.63) | 0.131   |
| <i>Fusobacterium<br/>canifelinum</i>   | 0.06 (0.01;<br>0.34)  | 0.002   | 0.12 (0.01;<br>1.22) | 0.074   | 0.07 (0.01;<br>0.90) | 0.041   | 0.07 (0.00;<br>0.92) | 0.043   | 0.12 (0.01;<br>1.99)  | 0.139   | 0.14 (0.01;<br>2.38) | 0.172   |
| <i>Fusobacterium<br/>nucleatum</i>     | 0.42 (0.27;<br>0.66)  | <0.001  | 0.67 (0.37;<br>1.19) | 0.171   | 0.58 (0.31;<br>1.07) | 0.081   | 0.68 (0.38;<br>1.22) | 0.192   | 0.88 (0.45;<br>1.74)  | 0.723   | 0.91 (0.49;<br>1.71) | 0.772   |
| <i>Fusobacterium<br/>periodonticum</i> | 0.16 (0.04;<br>0.60)  | 0.006   | 0.21 (0.04;<br>1.20) | 0.080   | 0.15 (0.02;<br>0.98) | 0.047   | 0.19 (0.03;<br>1.07) | 0.060   | 0.27 (0.04;<br>1.79)  | 0.175   | 0.26 (0.04;<br>1.67) | 0.154   |
| <i>Granulicatella adiacens</i>         | 0.88 (0.23;<br>3.32)  | 0.849   | 0.57 (0.10;<br>3.28) | 0.530   | 0.81 (0.13;<br>5.05) | 0.823   | 0.64 (0.11;<br>3.67) | 0.615   | 0.86 (0.09;<br>8.15)  | 0.893   | 0.76 (0.09;<br>6.27) | 0.798   |
| <i>Haemophilus<br/>parainfluenzae</i>  | 0.84 (0.72;<br>0.97)  | 0.019   | 0.87 (0.74;<br>1.03) | 0.109   | 0.89 (0.76;<br>1.04) | 0.149   | 0.87 (0.73;<br>1.03) | 0.096   | 0.91 (0.81;<br>1.02)  | 0.107   | 0.90 (0.79;<br>1.01) | 0.082   |
| <i>Leptotrichia buccalis</i>           | 1.62 (1.01;<br>2.60)  | 0.045   | 1.44 (0.88;<br>2.36) | 0.142   | 1.60 (0.96;<br>2.68) | 0.073   | 1.46 (0.88;<br>2.40) | 0.143   | 1.36 (0.76;<br>2.44)  | 0.295   | 1.31 (0.74;<br>2.31) | 0.357   |

|                                   |                      |       |                       |       |                       |       |                       |       |                      |       |                      |       |
|-----------------------------------|----------------------|-------|-----------------------|-------|-----------------------|-------|-----------------------|-------|----------------------|-------|----------------------|-------|
| <i>Leptotrichia genomosp.</i>     | 2.04 (1.00;<br>4.14) | 0.049 | 1.68 (0.68;<br>4.15)  | 0.262 | 1.58 (0.65;<br>3.84)  | 0.314 | 1.59 (0.65;<br>3.90)  | 0.313 | 1.22 (0.51;<br>2.95) | 0.652 | 1.31 (0.54;<br>3.18) | 0.554 |
| <i>Leptotrichia hofstadii</i>     | 2.12 (0.67;<br>6.69) | 0.202 | 2.75 (0.42;<br>18.15) | 0.292 | 3.01 (0.45;<br>20.15) | 0.255 | 2.61 (0.40;<br>16.99) | 0.315 | 1.62 (0.40;<br>6.50) | 0.497 | 1.57 (0.40;<br>6.14) | 0.515 |
| <i>Leptotrichia hongkongensis</i> | 1.02 (0.63;<br>1.67) | 0.922 | 0.69 (0.39;<br>1.24)  | 0.215 | 0.73 (0.40;<br>1.33)  | 0.304 | 0.73 (0.4;<br>1.33)   | 0.303 | 0.96 (0.45;<br>2.03) | 0.916 | 0.95 (0.44;<br>2.03) | 0.890 |
| <i>Leptotrichia wadei</i>         | 1.30 (0.69;<br>2.45) | 0.420 | 0.69 (0.27;<br>1.76)  | 0.437 | 0.66 (0.25;<br>1.71)  | 0.391 | 0.67 (0.27;<br>1.66)  | 0.386 | 0.67 (0.25;<br>1.83) | 0.437 | 0.62 (0.24;<br>1.65) | 0.340 |
| <i>Mannheimia varigena</i>        | 0.74 (0.53;<br>1.04) | 0.084 | 0.85 (0.57;<br>1.28)  | 0.446 | 0.85 (0.56;<br>1.29)  | 0.442 | 0.86 (0.57;<br>1.29)  | 0.457 | 0.88 (0.57;<br>1.37) | 0.581 | 0.86 (0.55;<br>1.34) | 0.510 |
| <i>Other</i>                      | 1.09 (0.98;<br>1.22) | 0.129 | 0.96 (0.82;<br>1.13)  | 0.644 | 0.99 (0.84;<br>1.16)  | 0.905 | 0.97 (0.83;<br>1.14)  | 0.721 | 0.96 (0.79;<br>1.16) | 0.657 | 0.97 (0.80;<br>1.17) | 0.730 |
| <i>Neisseria flavescens</i>       | 0.50 (0.21;<br>1.20) | 0.121 | 0.29 (0.06;<br>1.44)  | 0.128 | 0.26 (0.05;<br>1.35)  | 0.109 | 0.39 (0.08;<br>1.94)  | 0.248 | 0.17 (0.02;<br>1.54) | 0.115 | 0.27 (0.03;<br>2.48) | 0.248 |
| <i>Prevotella histicola</i>       | 1.99 (0.84;<br>4.70) | 0.117 | 1.35 (0.43;<br>4.26)  | 0.606 | 1.47 (0.46;<br>4.69)  | 0.516 | 1.38 (0.42;<br>4.54)  | 0.595 | 0.99 (0.27;<br>3.63) | 0.986 | 0.92 (0.26;<br>3.29) | 0.899 |
| <i>Prevotella maculosa</i>        | 0.93 (0.19;<br>4.47) | 0.931 | 0.24 (0.02;<br>2.93)  | 0.266 | 0.29 (0.02;<br>3.70)  | 0.343 | 0.24 (0.02;<br>3.04)  | 0.268 | 0.41 (0.02;<br>7.27) | 0.543 | 0.46 (0.03;<br>8.09) | 0.596 |
| <i>Prevotella melaninogenica</i>  | 1.06 (0.86;<br>1.30) | 0.597 | 1.13 (0.87;<br>1.46)  | 0.372 | 1.11 (0.86;<br>1.44)  | 0.424 | 1.14 (0.88;<br>1.47)  | 0.333 | 1.14 (0.83;<br>1.56) | 0.422 | 1.14 (0.84;<br>1.56) | 0.403 |
| <i>Prevotella oris</i>            | 1.64 (0.75;<br>3.57) | 0.216 | 1.13 (0.47;<br>2.74)  | 0.789 | 1.43 (0.55;<br>3.74)  | 0.463 | 1.17 (0.48;<br>2.85)  | 0.732 | 1.45 (0.47;<br>4.45) | 0.518 | 1.57 (0.52;<br>4.68) | 0.423 |
| <i>Prevotella oulorum</i>         | 0.39 (0.13;<br>1.12) | 0.081 | 0.12 (0.03;<br>0.54)  | 0.006 | 0.12 (0.03;<br>0.55)  | 0.007 | 0.11 (0.02;<br>0.54)  | 0.006 | 0.12 (0.02;<br>0.62) | 0.012 | 0.15 (0.03;<br>0.76) | 0.023 |
| <i>Prevotella pallens</i>         | 0.79 (0.36;<br>1.73) | 0.557 | 0.79 (0.25;<br>2.49)  | 0.684 | 0.89 (0.28;<br>2.81)  | 0.847 | 0.89 (0.29;<br>2.77)  | 0.843 | 1.42 (0.37;<br>5.44) | 0.605 | 1.50 (0.38;<br>5.82) | 0.562 |
| <i>Prevotella veroralis</i>       | 1.02 (0.51;<br>2.04) | 0.959 | 0.45 (0.17;<br>1.20)  | 0.110 | 0.37 (0.13;<br>1.05)  | 0.062 | 0.46 (0.17;<br>1.23)  | 0.123 | 0.30 (0.10;<br>0.92) | 0.035 | 0.32 (0.11;<br>0.94) | 0.038 |
| <i>Selenomonas noxia</i>          | 0.74 (0.31;<br>1.78) | 0.508 | 0.20 (0.06;<br>0.70)  | 0.012 | 0.22 (0.06;<br>0.77)  | 0.018 | 0.19 (0.05;<br>0.67)  | 0.010 | 0.23 (0.06;<br>0.88) | 0.032 | 0.24 (0.06;<br>0.93) | 0.039 |
| <i>Streptococcus gordonii</i>     | 0.31 (0.09;<br>1.15) | 0.081 | 0.19 (0.03;<br>1.07)  | 0.060 | 0.22 (0.04;<br>1.30)  | 0.095 | 0.20 (0.03;<br>1.13)  | 0.069 | 0.27 (0.03;<br>2.11) | 0.211 | 0.30 (0.04;<br>2.25) | 0.243 |
| <i>Streptococcus mutans</i>       | 1.00 (0.76;<br>1.33) | 0.978 | 0.84 (0.38;<br>1.85)  | 0.659 | 0.84 (0.39;<br>1.81)  | 0.653 | 0.84 (0.38;<br>1.86)  | 0.664 | 0.68 (0.25;<br>1.83) | 0.447 | 0.63 (0.18;<br>2.18) | 0.470 |

|                                |                       |       |                      |       |                      |       |                      |       |                       |       |                       |       |
|--------------------------------|-----------------------|-------|----------------------|-------|----------------------|-------|----------------------|-------|-----------------------|-------|-----------------------|-------|
| <i>Streptococcus sanguinis</i> | 4.58 (1.27;<br>16.55) | 0.020 | 1.9 (0.70;<br>5.16)  | 0.207 | 2.15 (0.78;<br>5.90) | 0.138 | 1.86 (0.68;<br>5.10) | 0.228 | 2.66 (0.87;<br>8.19)  | 0.088 | 2.73 (0.82;<br>9.11)  | 0.102 |
| <i>Veillonella alcalescens</i> | 1.13 (0.81;<br>1.59)  | 0.462 | 0.93 (0.55;<br>1.58) | 0.800 | 0.91 (0.55;<br>1.53) | 0.732 | 0.93 (0.55;<br>1.57) | 0.787 | 1.18 (0.63;<br>2.20)  | 0.613 | 1.23 (0.65;<br>2.34)  | 0.521 |
| <i>Veillonella parvula</i>     | 0.65 (0.21;<br>2.04)  | 0.461 | 1.26 (0.25;<br>6.34) | 0.782 | 1.32 (0.27;<br>6.48) | 0.734 | 1.30 (0.26;<br>6.47) | 0.752 | 2.53 (0.38;<br>16.74) | 0.335 | 2.78 (0.41;<br>18.82) | 0.296 |
| <i>Veillonella rogosae</i>     | 0.12 (0.03;<br>0.53)  | 0.005 | 0.12 (0.02;<br>0.88) | 0.037 | 0.08 (0.01;<br>0.69) | 0.022 | 0.11 (0.01;<br>0.91) | 0.041 | 0.15 (0.01;<br>1.65)  | 0.121 | 0.16 (0.01;<br>1.78)  | 0.137 |

Model 1: crude; Model 2: age, sex, and BMI; Model 3: age, sex, BMI, and bleeding; Model 4: age, sex, BMI, and periodontitis; Model 5: age, sex, BMI, HbA1c, insulin fasting, CRP, and bleeding; Model 6: age, sex, BMI, HbA1c, insulin fasting, CRP, and periodontitis.
